# Supplementary material
Source: PubMed Central journal article supplement (PMC10616766)
Supplement: jamapediatr-e234588-s002.pdf [file jamapediatr-e234588-s002.pdf]

## Data Sharing Statement

van der Loos. Bone Mineral Density in Transgender Adolescents Treated With Puberty Suppression and Subsequent Gender-Affirming Hormones. *JAMA Pediatr*. Published October 30, 2023. doi:10.1001/jamapediatrics.2023.4588

### Data

**Data available:** No
